# Supplementary material for: Effects of Biostimulants on the Chemical Composition of Essential Oil and Hydrosol of Lavandin (Lavandula x intermedia Emeric ex Loisel.) Cultivated in Tuscan-Emilian Apennines
Source: MDPI journal article supplement (doi:10.3390/molecules26206157), 2021-10-12
Supplement: s1 [file s1]

The semi-quantitative data of the chemical composition of EOs were subjected to one-way ANOVA to highlight significant differences ( $p < 0.05$ ). The analysis was performed within the farms (Table S1) by considering all the 12 EOs belonging to each farm, disregarding the type of treatment.

**Table S1.** One-way ANOVA results of significant differences between farms. The mean and the standard deviation (SD) of each terpene in each farm are reported and distinct letters statistically differ according to Tukey's post-hoc test ( $p < 0.05$ ). Homogeneous subsets are indicated by the same letter.

| Terpene                | (p<)   | Farm | Mean $\pm$ SD (n=12) | * |
|------------------------|--------|------|----------------------|---|
| $\alpha$ -pinene       | 0.0001 | CA   | 0.55 $\pm$ 0.06      | b |
|                        |        | PE   | 0.44 $\pm$ 0.06      | a |
|                        |        | PR   | 0.57 $\pm$ 0.08      | b |
| Camphene               | 0.0001 | CA   | 0.47 $\pm$ 0.05      | b |
|                        |        | PE   | 0.33 $\pm$ 0.03      | a |
|                        |        | PR   | 0.36 $\pm$ 0.03      | a |
| Sabinene               | 0.0001 | CA   | 0.16 $\pm$ 0.03      | b |
|                        |        | PE   | 0.13 $\pm$ 0.01      | a |
|                        |        | PR   | 0.19 $\pm$ 0.03      | c |
| $\beta$ -pinene        | 0.0001 | CA   | 0.15 $\pm$ 0.02      | a |
|                        |        | PE   | 0.43 $\pm$ 0.06      | b |
|                        |        | PR   | 0.61 $\pm$ 0.11      | c |
| Oct-1-en-3-ol          | 0.0001 | CA   | 0.92 $\pm$ 0.09      | c |
|                        |        | PE   | 0.26 $\pm$ 0.04      | b |
|                        |        | PR   | 0.19 $\pm$ 0.07      | a |
| $\alpha$ -phellandrene | 0.0001 | CA   | 0.13 $\pm$ 0.03      | b |
|                        |        | PE   | 0.07 $\pm$ 0.01      | a |
|                        |        | PR   | 0.08 $\pm$ 0.01      | a |
| 3-carene               | 0.0001 | CA   | 0.26 $\pm$ 0.06      | c |
|                        |        | PE   | 0.1 $\pm$ 0.02       | a |
|                        |        | PR   | 0.17 $\pm$ 0.03      | b |
| Limonene               | 0.0001 | CA   | 5.16 $\pm$ 2.01      | b |
|                        |        | PE   | 0.91 $\pm$ 0.13      | a |
|                        |        | PR   | 0.86 $\pm$ 0.27      | a |
| 1,8-cineole            | 0.0001 | CA   | 3.21 $\pm$ 0.9       | a |
|                        |        | PE   | 4.54 $\pm$ 0.41      | b |
|                        |        | PR   | 5.85 $\pm$ 0.86      | c |
| cis-ocimene            | 0.0001 | CA   | 4.22 $\pm$ 0.71      | b |
|                        |        | PE   | 1.29 $\pm$ 0.18      | a |
|                        |        | PR   | 1.53 $\pm$ 0.15      | a |
| trans-ocimene          | 0.0001 | CA   | 1.64 $\pm$ 0.97      | b |
|                        |        | PE   | 0.65 $\pm$ 0.16      | a |
|                        |        | PR   | 0.63 $\pm$ 0.11      | a |
| $\gamma$ -terpinene    | 0.019  | CA   | 0.35 $\pm$ 0.36      | b |
|                        |        | PE   | 0.13 $\pm$ 0.02      | a |
|                        |        | PR   | 0.13 $\pm$ 0.02      | a |

|                        |        |    |              |    |
|------------------------|--------|----|--------------|----|
| trans-Sabinene hydrate | 0.013  | CA | 0.16 ± 0.08  | b  |
|                        |        | PE | 0.09 ± 0.02  | a  |
|                        |        | PR | 0.14 ± 0.04  | b  |
| cis linalool oxide     | 0.003  | CA | 0.13 ± 0.01  | a  |
|                        |        | PE | 0.15 ± 0.01  | b  |
|                        |        | PR | 0.14 ± 0.02  | ab |
| trans linalool oxide   | 0.0001 | CA | 0.52 ± 0.06  | b  |
|                        |        | PE | 0.46 ± 0.05  | a  |
|                        |        | PR | 0.44 ± 0.03  | a  |
| Linalool               | 0.0001 | CA | 48.31 ± 3.71 | c  |
|                        |        | PE | 33.4 ± 1.03  | b  |
|                        |        | PR | 29.4 ± 1.54  | a  |
| Camphor                | 0.0001 | CA | 2.02 ± 0.37  | a  |
|                        |        | PE | 6.42 ± 0.34  | b  |
|                        |        | PR | 7.44 ± 0.34  | c  |
| trans-verbenol         | 0.0001 | CA | 0.16 ± 0.02  | b  |
|                        |        | PE | 0.1 ± 0.01   | a  |
|                        |        | PR | 0.1 ± 0.01   | a  |
| Borneol                | 0.0001 | CA | 11.39 ± 1.14 | c  |
|                        |        | PE | 3.97 ± 0.32  | b  |
|                        |        | PR | 2.65 ± 0.24  | a  |
| Lavandulol             | 0.0001 | CA | 0.64 ± 0.09  | c  |
|                        |        | PE | 0.47 ± 0.04  | b  |
|                        |        | PR | 0.41 ± 0.05  | a  |
| Terpinen-4-ol          | 0.0001 | CA | 5.38 ± 0.5   | b  |
|                        |        | PE | 1.96 ± 0.08  | a  |
|                        |        | PR | 2 ± 0.09     | a  |
| α-terpineol            | 0.0001 | CA | 0.27 ± 0.04  | a  |
|                        |        | PE | 0.7 ± 0.12   | b  |
|                        |        | PR | 0.73 ± 0.11  | b  |
| Myrtenal               | 0.0001 | CA | 0.51 ± 0.03  | c  |
|                        |        | PE | 0.25 ± 0.01  | b  |
|                        |        | PR | 0.2 ± 0.01   | a  |
| Nerol                  | 0.0001 | CA | 0.16 ± 0.01  | b  |
|                        |        | PE | 0.08 ± 0.02  | a  |
|                        |        | PR | 0.08 ± 0.02  | a  |
| Carvone                | 0.0001 | CA | 0.14 ± 0.01  | c  |
|                        |        | PE | 0.13 ± 0.01  | b  |
|                        |        | PR | 0.11 ± 0.00  | a  |
| Lynalil acetate        | 0.0001 | CA | 4.88 ± 0.59  | a  |
|                        |        | PE | 30.89 ± 1.69 | b  |
|                        |        | PR | 32.66 ± 1.47 | c  |
| Lavandulyl acetate     | 0.0001 | CA | 1.2 ± 0.14   | a  |
|                        |        | PE | 2.91 ± 0.11  | b  |
|                        |        | PR | 2.89 ± 0.24  | b  |
| Neryl acetate          | 0.0001 | CA | 0.06 ± 0.01  | a  |
|                        |        | PE | 0.27 ± 0.05  | b  |
|                        |        | PR | 0.27 ± 0.05  | b  |
| β-cubebene             | 0.0001 | CA | 0.08 ± 0.02  | a  |

|                 |        |    |             |   |
|-----------------|--------|----|-------------|---|
|                 |        | PE | 0.58 ± 0.09 | b |
|                 |        | PR | 0.58 ± 0.09 | b |
| β-caryophyllene | 0.0001 | CA | 0.45 ± 0.05 | a |
|                 |        | PE | 1.55 ± 0.11 | b |
|                 |        | PR | 1.8 ± 0.14  | c |
| α-bergamotene   | 0.0001 | CA | 0.06 ± 0.01 | a |
|                 |        | PE | 0.12 ± 0.01 | b |
|                 |        | PR | 0.16 ± 0.02 | c |
| β-farnesene     | 0.0001 | CA | 2.14 ± 0.27 | b |
|                 |        | PE | 1.18 ± 0.11 | a |
|                 |        | PR | 1.28 ± 0.11 | a |
| Ar curcumene    | 0.0001 | CA | 0.18 ± 0.04 | a |
|                 |        | PE | 0.68 ± 0.07 | b |
|                 |        | PR | 0.88 ± 0.08 | c |
| δ-cadinene      | 0.015  | CA | 0.47 ± 0.09 | a |
|                 |        | PE | 0.55 ± 0.07 | b |
|                 |        | PR | 0.57 ± 0.09 | b |

One-way ANOVA was also performed within the treatments in each farm. In table S2, the significant differences observed were reported.

**Table S2.** One-way ANOVA results of significant differences between treatments in farms. The mean and the standard deviation (SD) of each terpene in each treatment group in the same farm are reported and distinct letters statistically differ according to Tukey's post-hoc test ( $p < 0.05$ ). Homogeneous subsets are indicated by the same letter.

| Preci          |       |           |               |    | Campazzo      |       |           |             |   |
|----------------|-------|-----------|---------------|----|---------------|-------|-----------|-------------|---|
|                | p<    | Treatment | Mean ± SD     | *  | Terpene       | p<    | Treatment | Mean ± SD   |   |
| Sabinene       | 0.012 | CTRL      | 0.152 ± 0.024 | a  | neryl acetate | 0.001 | CTRL      | 0.07 ± 0.01 | b |
|                |       | CTRL W    | 0.214 ± 0.019 | b  |               |       | CTRL W    | 0.05 ± 0.01 | a |
|                |       | T1        | 0.189 ± 0.016 | ab |               |       | T1        | 0.05 ± 0.01 | a |
|                |       | T2        | 0.212 ± 0.013 | b  |               |       | T2        | 0.05 ± 0.00 | a |
| α-phellandrene | 0.005 | CTRL      | 0.065 ± 0.000 | a  | α-bergamotene | 0.001 | CTRL      | 0.06 ± 0.00 | b |
|                |       | CTRL W    | 0.077 ± 0.000 | ab |               |       | CTRL W    | 0.05 ± 0.00 | a |
|                |       | T1        | 0.083 ± 0.008 | b  |               |       | T1        | 0.05 ± 0.00 | a |
|                |       | T2        | 0.082 ± 0.008 | b  |               |       | T2        | 0.07 ± 0.01 | b |
| 1,8-cineole    | 0.013 | CTRL      | 4.75 ± 0.71   | a  |               |       |           |             |   |
|                |       | CTRL W    | 6.42 ± 0.44   | b  |               |       |           |             |   |
|                |       | T1        | 5.76 ± 0.30   | ab |               |       |           |             |   |
|                |       | T2        | 6.48 ± 0.57   | b  |               |       |           |             |   |
| Linalool       | 0.038 | CTRL      | 31.05 ± 0.25  | b  |               |       |           |             |   |
|                |       | CTRL W    | 27.82 ± 1.24  | a  |               |       |           |             |   |
|                |       | T1        | 29.73 ± 1.33  | ab |               |       |           |             |   |
|                |       | T2        | 28.99 ± 1.19  | ab |               |       |           |             |   |
| Camphor        | 0.003 | CTRL      | 6.97 ± 0.14   | a  |               |       |           |             |   |
|                |       | CTRL W    | 7.67 ± 0.16   | b  |               |       |           |             |   |

|                    |       |        |             |    |
|--------------------|-------|--------|-------------|----|
|                    |       | T1     | 7.40 ± 0.18 | ab |
|                    |       | T2     | 7.70 ± 0.21 | b  |
| Borneol            | 0.001 | CTRL   | 3.01 ± 0.02 | b  |
|                    |       | CTRL W | 2.59 ± 0.16 | a  |
|                    |       | T1     | 2.55 ± 0.03 | a  |
|                    |       | T2     | 2.46 ± 0.24 | a  |
| Lavandulol         | 0.001 | CTRL   | 0.48 ± 0.03 | b  |
|                    |       | CTRL W | 0.38 ± 0.01 | a  |
|                    |       | T1     | 0.38 ± 0.01 | a  |
|                    |       | T2     | 0.37 ± 0.03 | a  |
| Terpinen-4-ol      | 0.032 | CTRL   | 2.05 ± 0.05 | ab |
|                    |       | CTRL W | 2.00 ± 0.09 | ab |
|                    |       | T1     | 2.07 ± 0.04 | b  |
|                    |       | T2     | 1.97 ± 0.05 | a  |
| Lavandulyl acetate | 0.008 | CTRL   | 3.11 ± 0.17 | b  |
|                    |       | CTRL W | 3.06 ± 0.12 | b  |
|                    |       | T1     | 2.64 ± 0.04 | a  |
|                    |       | T2     | 2.75 ± 0.18 | ab |

**Table S3.** Weather conditions and soil parameter of the investigated farms. PE = Pedroni Paola, Zocca, Modena, Italy; PR = Preci Carlo, Villa d'Aiano, Castel d'Aiano, Bologna, Italy; CA = Campazzo, Montombraro of Zocca, Modena, Italy; a.s.l. = above sea level.

| Parameters                                | Farms      |           |            |
|-------------------------------------------|------------|-----------|------------|
|                                           | PE         | PR        | CA         |
| <b>Weather conditions during the year</b> |            |           |            |
| Average Temperature (°C)                  | 11         | 11        | 12         |
| Total rainfall (mm)                       | 630        | 665       | 620        |
| Altitude a.s.l. (m)                       | 758        | 805       | 727        |
| Field exposure                            | E          | S         | N-W        |
| <b>Soil</b>                               |            |           |            |
| Clay (%)                                  | 40.95      | 26.22     | 42.15      |
| Silt (%)                                  | 40.73      | 52.83     | 45.02      |
| Sand (%)                                  | 18.32      | 20.95     | 12.83      |
| Texture (USDA)                            | Silty Clay | Silt Loam | Silty Clay |
| pH (in water)                             | 7.70       | 7.90      | 7.90       |
| Organic matter (%)                        | 3.21       | 1.45      | 2.39       |
| Total nitrogen (%)                        | 0.23       | 0.10      | 0.17       |
| C/N                                       | 8.20       | 8.60      | 8.20       |
| Exchangeable potassium (ppm)              | 262.50     | 218.13    | 367.50     |
| Assimilable phosphorous (ppm)             | 8.43       | 7.01      | 10.85      |
